# Supplementary material for: miR2119, a Novel Transcriptional Regulator, Plays a Positive Role in Woody Plant Drought Tolerance by Mediating the Degradation of the CkBI-1 Gene Associated with Apoptosis
Source: MDPI journal article supplement (doi:10.3390/ijms23116306), 2022-06-04
Supplement: s1 [file s1]

# **miR2119, a Novel Transcriptional Regulator, Plays a Positive Role in Woody Plant Drought Tolerance by Mediating the Degradation of the *CkBI-1* Gene Associated with Apoptosis**

**Fu-Rong Liu <sup>1</sup>, Pu-Zhi Zhang <sup>1</sup>, Jia-Yang Li <sup>2</sup>, Tian-Xin Zhang <sup>1</sup>, Li-Fang Xie <sup>1</sup> and Chun-Mei Gong <sup>2,\*</sup>**

<sup>1</sup> College of Life Sciences, Northwest A&F University, Yangling, Shaanxi Province, China; 2809694906@qq.com(F.-R.L.); 1299346584@qq.com(P.-Z.Z.); tianxinzhang@nwafu.edu.cn(T.-X.Z.); 1347989419@qq.com(L.-F.X.)

<sup>2</sup> College of Horticulture, Northwest A&F University, Yangling, Shaanxi Province, China; jiayang@nwafu.edu.cn(J.-Y.L.)

\* Correspondence: gcm228@nwafu.edu.cn(C.-M.G.)

**Table S1** Related gene cloning primer sequences of *C. korshinskii*.

| Primer name          | Primer sequence(5'-3')                   |
|----------------------|------------------------------------------|
| <i>miR319-F</i>      | CATGCCATGGCAAACACACGCTCGGACG             |
| <i>miR319-R</i>      | GAAGATCTGGGATGCCTTAAATAAAGATAAACCC       |
| <i>CkmiR2119-I</i>   | GATCAAAGGGAGGTGTGGAGTAGTCTCTCTTTGTATTCC  |
| <i>CkmiR2119-II</i>  | GACTACTCCACACCTCCCTTTGATCAAAGAGAATCAATGA |
| <i>CkmiR2119-III</i> | GACTCCTCCACACCTGCCTTTGTTCACAGGTCGTGATATG |
| <i>CkmiR2119-IV</i>  | GAACAAAGGCAGGTGTGGAGGAGTCTACATATATATTCCT |
| <i>CkBI-1-F</i>      | CATGCCATGGACGCGTTTACATCGTTC              |
| <i>CkBI-1-R</i>      | TGAAGATCTGGATCTTTCCTCTTCTTCTTCCT         |

**Table S2** qRT-PCR primer sequences of *C. korshinskii*.

| Primer name           | Primer sequence(5'-3')    |
|-----------------------|---------------------------|
| <i>RT-CkmiR2119-F</i> | GCGGCGGTCAAAGGGAGGTGTG    |
| <i>RT-CkmiR2119-R</i> | ATCCAGTGCAGGGTCCGAGG      |
| <i>RT-CkBI-1-F</i>    | CGATACTCTCAAGAACTTCCGTCAG |
| <i>RT-CkBI-1-R</i>    | CATGGTTCCAAGGGACGCTAC     |
| <i>u6-F</i>           | GGAACGATACAGAAGATTAGCA    |
| <i>u6-R</i>           | GTGCAGGGTCCGAGGT          |
| <i>CkUB-F</i>         | GACTTTGACCGGGAAGACCA      |
| <i>CkUB -R</i>        | CACCACGAAGACGGAGCACA      |

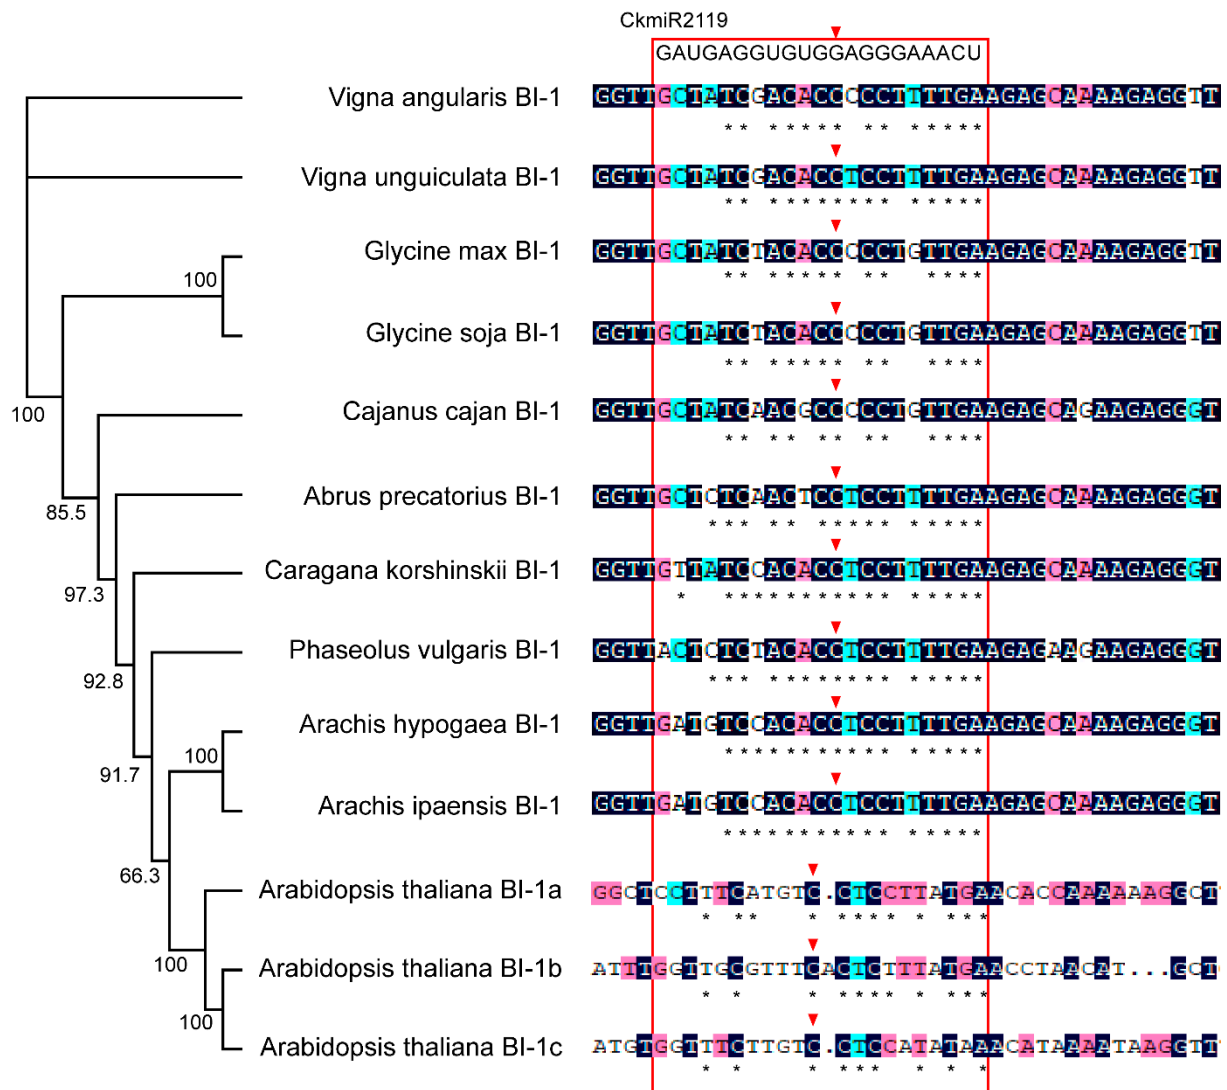

**Figure S1.** Phylogenetic tree analysis and multiple sequence alignment of BI-1 in *C. korshinskii*, *Glycine max*, *Glycine soja*, *Cajanus cajan*, *Vigna angularis*, *Abrus precatorius*, *Phaseolus vulgaris*, *Arachis hypogaea*, *Arachis ipaensis*, *Arabidopsis thaliana* and *Vigna unguiculata*. The phylogenetic tree was constructed using the full-length CDS sequences of the BI-1 gene of the above species. Bootstrap support (1000 repetitions) is shown for each node. \* indicates that this base can pair with CkmiR2119.

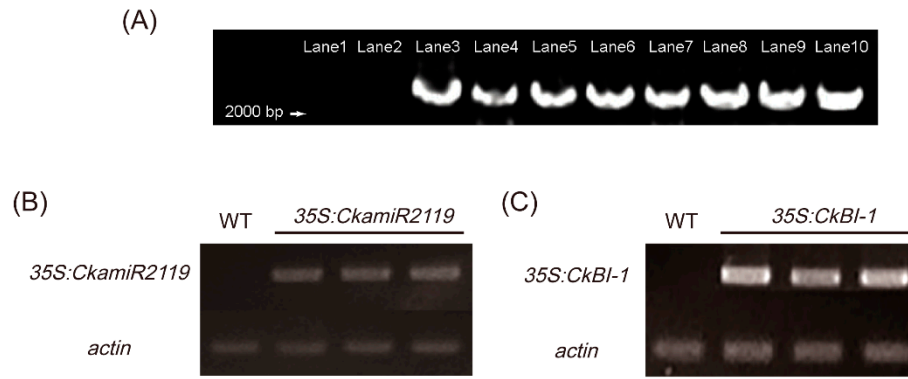

**Figure S2.** Screening of *CkamiR2119* and *CkBI-1* transgenic tobacco plants. (A) GUS gene detection of T<sub>0</sub> transgenic plants. Lane 1 was water, Lane 2 was wild control plant, Lane 3 was vector, Lane 4 - Lane 6 were *CkamiR2119* transgenic tobacco plants, Lane 7 - Lane 8 were *CkBI-1* transgenic tobacco plants, Lane 9 - Lane 10 were vector transgenic tobacco plants. (B) qRT-PCR identification of T<sub>3</sub> generation *CkamiR2119* transgenic plants. (C) qRT-PCR identification of T<sub>3</sub> generation *CkBI-1* transgenic plants.
